## BRAIN AND BODY OXYGEN REQUIREMENTS OF *GNATHONEMUS PETERSII*, A FISH WITH AN EXCEPTIONALLY LARGE BRAIN

GÖRAN E. NILSSON

Vertebrate Physiology and Behaviour Unit, Department of Limnology, Uppsala University, Norbyvägen 20, S-752 36 Uppsala, Sweden

Accepted 31 October 1995

### Summary

Vertebrates have repeatedly been noted for having remarkably constant ratios of brain to body O<sub>2</sub> consumption, the brain using 2–8% of resting body O<sub>2</sub> consumption, suggesting that evolution has put strict limits on the energetic cost of brain function. Only man, with a value of 20%, is an exception to this rule. However, the results presented here suggest that, in the electric fish *Gnathonemus petersii*, the brain is responsible for approximately 60% of body O<sub>2</sub> consumption, a figure three times higher than that for any other vertebrate studied, including man. The exceptionally high energetic cost of the *G. petersii* brain appears to be a consequence both of the brain being very large and of the fish being ectothermic.

It was also found that *G. petersii* has a high ability to utilise O<sub>2</sub> at low levels. Thus, during falling [O<sub>2</sub>], this species was found to maintain both its O<sub>2</sub> uptake and its electric discharge rate down to an ambient O<sub>2</sub> level of 0.8 mg l<sup>-1</sup> (at 26 °C), although it was unable to tolerate an [O<sub>2</sub>] below 0.3 mg l<sup>-1</sup>. During severe hypoxia (<0.8 mg l<sup>-1</sup>), *G. petersii* attempted to gulp air from the water surface. These results establish a new record for the energetic cost of a vertebrate brain and they show that the species possessing such a brain has a high capacity for utilising O<sub>2</sub> at very low ambient concentrations.

Key words: Mormyridae, *Gnathonemus petersii*, oxygen consumption, anoxia, hypoxia, energetics, brain size, electric fishes.

### Introduction

The brain of man has hitherto been thought to account for the largest fraction of whole-body energy expenditure in vertebrates. The human brain consumes some 20% of the O<sub>2</sub> taken up by the resting body (Crile, 1941; Mink *et al.* 1981). This has been put forward as the only gross physiological measure that makes the human brain unique among vertebrates, since its relative size *per se*, although corresponding to an impressive 2% of body mass, is surpassed by that of several small mammals and birds (Crile and Quiring, 1940; Krompecher and Lipák, 1966). It has been pointed out that other vertebrates are remarkably uniform with respect to the ratio of brain to body O<sub>2</sub> consumption, which is of the order of 0.02–0.08, essentially regardless of body size (Crile, 1941; Mink *et al.* 1981). In fact, the only vertebrates known to possess brains consuming more than 10% of total O<sub>2</sub> intake are some primates (11–13%) and man (Mink *et al.* 1981). It is possible that the brain of the porpoise *Phocaena phocaena* also consumes a comparatively high fraction of the total O<sub>2</sub> inspired, since it constitutes 1.2% of body mass (Crile and Quiring, 1940).

The uniqueness of the human brain with regard to its exceptionally high rate of energy use appears to have remained undisputed. However, in Africa, there is a group of weakly electric fishes, the elephant nose fishes (Mormyridae), that has

been noted for having unusually large brains (Erdl, 1846), a character that is probably, at least in part, related to their ability to communicate by generating and perceiving electric fields (Hopkins, 1983; Nieuwenhuys and Nicholson, 1969). In contrast to man, it is the cerebellum, and not the telencephalon (cerebrum) that is greatly enlarged in these fishes, the structure being appropriately named the gigantocerebellum. From an evolutionary and ecophysiological point of view, the energetic cost of this brain may be more important than its size *per se*. As ectothermic vertebrates, these fish are expected to have low rates of whole-body O<sub>2</sub> consumption which could result in the brain comprising a relatively large fraction of the whole-body energy budget. However, brain and body O<sub>2</sub> consumption have never been measured in mormyrids. Moreover, since the vertebrate brain is normally very sensitive to low P<sub>O<sub>2</sub></sub>, the hypoxia-tolerance of an animal with such a huge brain is of particular interest.

The aim of the present study was to measure brain and body O<sub>2</sub> consumption in the west African mormyrid *Gnathonemus petersii*, so that the ratio of brain to body O<sub>2</sub> consumption could be estimated. In addition, the ability of this fish to regulate O<sub>2</sub> consumption and electric pulse rate in response to falling O<sub>2</sub> levels, as well as its tolerance to severe hypoxia, were examined.

### Materials and methods

*Gnathonemus petersii* Günther were obtained from a fish dealer in Uppsala, Sweden. They were held in an aquarium at 26 °C (16 fish in 250 l) and fed chironomid larvae daily until satiation, for at least 1 month before the experiments. All experiments were carried out at 26 °C.

Four experiments were performed on the 16 fish available. In the first experiment, body O<sub>2</sub> consumption was determined in four fish during decreasing O<sub>2</sub> levels in a closed respirometer. In the second experiment, the brains of four fish were removed and O<sub>2</sub> consumption of brain slices was determined. In the third experiment, five fish were exposed to more rapidly falling O<sub>2</sub> levels by bubbling the water with N<sub>2</sub> and their behaviour was observed. In a final group of three fish, body O<sub>2</sub> consumption and the discharge rate of the electric organ were determined simultaneously during falling O<sub>2</sub> levels in a closed respirometer.

Body O<sub>2</sub> consumption rates of *G. petersii* at different ambient O<sub>2</sub> concentrations were measured using closed respirometry in a 2 l respirometer as previously described (Nilsson, 1992). Each fish, which had not been fed for 24 h, was allowed to respire in the respirometer until the O<sub>2</sub> concentration reached approximately 0.3 mg l<sup>-1</sup>, which took 780–1500 min (depending on fish size). The rate of O<sub>2</sub> consumption was calculated over 6 min intervals. After having been put into the respirometer, the fish initially showed a relatively high level of locomotor activity, causing rates of O<sub>2</sub> consumption to increase above resting values. In consequence, the first 200 min of the experiments were excluded from the calculations. The critical ambient O<sub>2</sub> level was determined as follows. A linear regression line was calculated from the O<sub>2</sub> consumption values measured at ambient O<sub>2</sub> levels above 1.5 mg l<sup>-1</sup> (since no tendency for a break in the O<sub>2</sub> consumption curve was seen above that level; Fig. 1). The critical ambient O<sub>2</sub> level was assumed to correspond to the first data point that fell below this line if all subsequent values of O<sub>2</sub> consumption were also below the regression line.

The electric discharge of the fish was recorded using two stainless-steel rods (30 mm long, 3 mm diameter) introduced into the respirometer and connected to an a.c. amplifier. The discharge frequency (Fig. 2) was calculated from the time taken to record 4096 discharges. The frequencies recorded (generally 10–15 pulses s<sup>-1</sup>) constituted average values over 4.5–7 min periods.

Brain slices (300 µm thick) were prepared from the whole lateral half of a brain using a Vibratome (Vibroslice 752; WPI, UK). Their O<sub>2</sub> consumption rates were determined (within 1 h of preparation) in a 1.6 ml thermostatted (26 °C) glass chamber equipped with a Clark O<sub>2</sub> electrode. Approximately 40 mg of randomly selected brain slices were used for each measurement. The slice preparation and O<sub>2</sub> consumption measurements were carried out in oxygenated brain-slice Ringer's solution prepared as described previously (Johansson *et al.* 1995).

Values are presented as means ± s.d.

### Results

Table 1 shows that the brain of *G. petersii* constitutes 3.1% of the body mass and that it is responsible for 60% of whole-body O<sub>2</sub> consumption. The corresponding values for the human brain are approximately 2.3% and 20%, respectively, while those for other vertebrates are considerably lower. The estimated *in situ* values for O<sub>2</sub> consumption of the *G. petersii* brain and the brains of other fishes were obtained by multiplying brain-slice O<sub>2</sub> consumption by a factor of two (see Discussion).

Whole-body O<sub>2</sub> consumption rates measured during decreasing ambient P<sub>O<sub>2</sub></sub> (Figs 1, 2) showed that the critical O<sub>2</sub> level for steady rates of O<sub>2</sub> consumption was 0.77±0.10 mg O<sub>2</sub> l<sup>-1</sup> (N=7), i.e. an O<sub>2</sub> saturation of approximately 10% at 26 °C. At a normoxic O<sub>2</sub> level in water (5 mg l<sup>-1</sup>), the rate of O<sub>2</sub> consumption of the fish was 0.102±0.020 mg g<sup>-1</sup> h<sup>-1</sup> (Table 1; Figs 1, 2).

In a separate experiment, five fish were put in a 5 l aquarium in which the O<sub>2</sub> content was lowered to less than 0.3 mg l<sup>-1</sup> within 2 h by bubbling with N<sub>2</sub>. When the O<sub>2</sub> concentration fell below 0.8 mg l<sup>-1</sup>, the fish started to gulp air (in this case N<sub>2</sub>) from the surface, clearly an attempt to increase their O<sub>2</sub> uptake. Finally, when the O<sub>2</sub> content fell below 0.3 mg l<sup>-1</sup>, the experiment had to be abandoned, since within 14–18 min all fish had problems with maintaining an upright body posture, clearly indicating an inability to tolerate such a low ambient O<sub>2</sub> concentration.

Fig. 2 shows electric discharge frequencies and O<sub>2</sub> consumption rates of three individuals in response to falling ambient O<sub>2</sub> levels. Both the electric activity and the O<sub>2</sub> consumption remained relatively constant down to the same

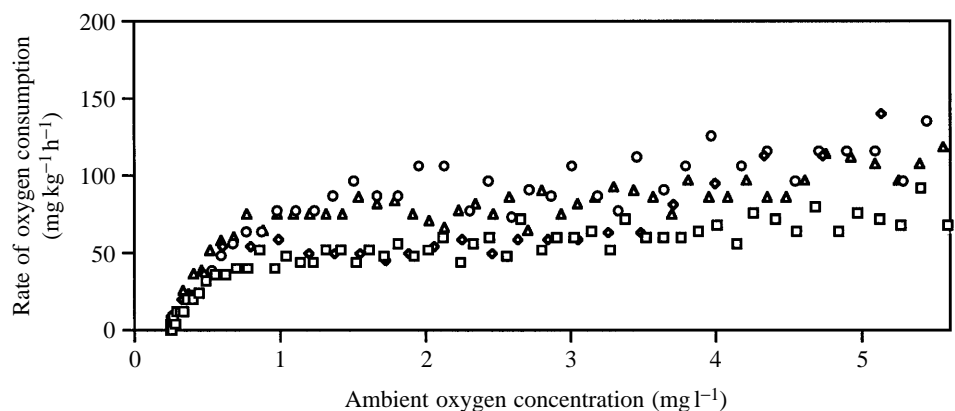

Fig. 1. O<sub>2</sub> consumption rate of *Gnathonemus petersii* at different water O<sub>2</sub> levels measured using closed respirometry. Different symbols are used to identify four individuals.

critical O<sub>2</sub> level ( $0.82 \pm 0.05 \text{ mg l}^{-1}$  and  $0.77 \pm 0.1 \text{ mg l}^{-1}$ , respectively).

### Discussion

#### Brain and body O<sub>2</sub> consumption rates

The brain of the mormyrid fish *G. petersii* consumes a larger

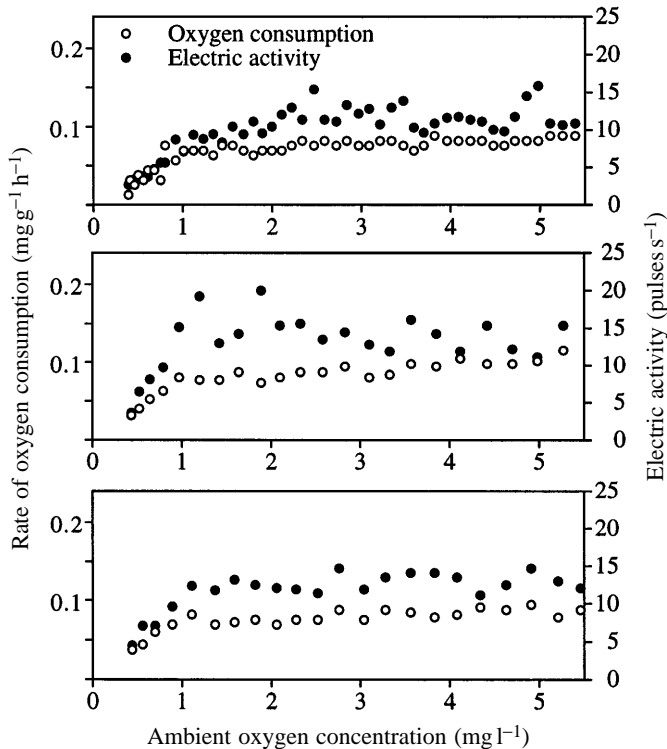

Fig. 2. *Gnathonemus petersii* electric discharge frequencies and O<sub>2</sub> consumption rates recorded simultaneously at different water O<sub>2</sub> levels. Each graph is for a different individual.

fraction, i.e. approximately 60%, of the whole-body O<sub>2</sub> intake than any other vertebrate brain studied, including the human brain, which had been thought to hold the record in this respect. The *in situ* O<sub>2</sub> consumption of the *G. petersii* brain (Table 1) was estimated by multiplying the *in vitro* values of brain slices by a factor of two. This was done because brain slices are energetically depressed, showing very low spontaneous electric activity. Brain slices from mammals consume only about half of the O<sub>2</sub> consumed by the intact brain (McIlwain and Bachelard, 1971; Mink *et al.* 1981; Lipton and Whittingham, 1984). The small size of *G. petersii* did not allow the catheterization of blood vessels necessary for measuring O<sub>2</sub> consumption of the brain *in situ*.

Whereas total energy expenditures of ectothermic vertebrates (Fig. 3B) are about 1/13 of those of endotherms at the same temperature and body size, mass-specific energy expenditures of the brains of ectothermic and endothermic vertebrates are much more similar (Fig. 3A). The average brain O<sub>2</sub> consumption rate of the three ectothermic vertebrates shown in Fig. 3A (derived from Table 1) is  $4.95 \text{ mg g}^{-1} \text{ h}^{-1}$  (at 37°C), which is not much lower than the  $7.74 \text{ mg g}^{-1} \text{ h}^{-1}$  expected for an endothermic brain of the same average size (deduced from the regression line for endothermic brains in Fig. 3A). In fact, the O<sub>2</sub> consumption rate of the rainbow trout brain lies on the regression line for endothermic brains. Thus, with regard to the whole-body energy budget, it is comparatively more expensive for an ectothermic vertebrate to have a large brain. This may be a reason why most ectothermic vertebrates have relatively small brains, resulting in the strikingly constant ratio of brain to body O<sub>2</sub> consumption found for both ectothermic and endothermic vertebrates. Consequently, the fact that *G. petersii* is an ectothermic vertebrate and has such a huge brain makes this organ an exceptionally expensive part of the whole body.

Table 1. Brain mass, body mass and O<sub>2</sub> consumption of *Gnathonemus petersii* and some other vertebrates

| Species                 | Temperature (°C) | Body mass (g) | Brain mass (g) | Mass ratio, brain/body | Body rate of O <sub>2</sub> consumption (mg g <sup>-1</sup> h <sup>-1</sup> ) | Brain slice rate of O <sub>2</sub> consumption (mg g <sup>-1</sup> h <sup>-1</sup> ) | Estimated rate of brain O <sub>2</sub> consumption <i>in situ</i> (mg g <sup>-1</sup> h <sup>-1</sup> ) | O <sub>2</sub> consumption ratio, brain/body |
|-------------------------|------------------|---------------|----------------|------------------------|-------------------------------------------------------------------------------|--------------------------------------------------------------------------------------|---------------------------------------------------------------------------------------------------------|----------------------------------------------|
| <i>G. petersii</i>      | 26               | 5.85±1.84     | 0.177±0.050    | 0.0309±0.0034          | 0.102±0.020                                                                   | 1.01±0.06                                                                            | 2.02±0.12                                                                                               | 0.600±0.074                                  |
| <i>Carassius</i>        | 20               | 10            | 0.100          | 0.0100                 | 0.099                                                                         | 0.36                                                                                 | 0.72                                                                                                    | 0.072                                        |
| <i>Salmo/Salvelinus</i> | 20               | 50            | 0.150          | 0.0030                 | 0.160                                                                         | 1.10                                                                                 | 2.20                                                                                                    | 0.041                                        |
| <i>Rattus</i>           | 37               | 278           | 2.3            | 0.0083                 | 1.045                                                                         | 3.07                                                                                 | 6.02                                                                                                    | 0.048                                        |
| Man                     | 37               | 54 333        | 1274           | 0.0234                 | 0.303                                                                         |                                                                                      | 2.61                                                                                                    | 0.202                                        |

Values for *Salmo/Salvelinus* are from Peterson and Anderson (1969), except for body O<sub>2</sub> consumption which is from Beamish (1964).

Values for *Carassius* (*C. auratus* and *C. carassius*) are estimates from calorimetric measurements compiled or measured by Johansson *et al.* (1995).

Values for man and rat (*Rattus*) are those compiled by Mink *et al.* (1981), except for the rat brain slice data which are from Benjamin and Verjee (1980).

The data for *G. petersii* are means ± s.d. from seven (body O<sub>2</sub> consumption), four (brain slice O<sub>2</sub> consumption) or 12 (mass) animals.

The estimates of brain O<sub>2</sub> consumption *in situ* for the fishes were obtained by multiplying the brain slice values by a factor of two (see Discussion).

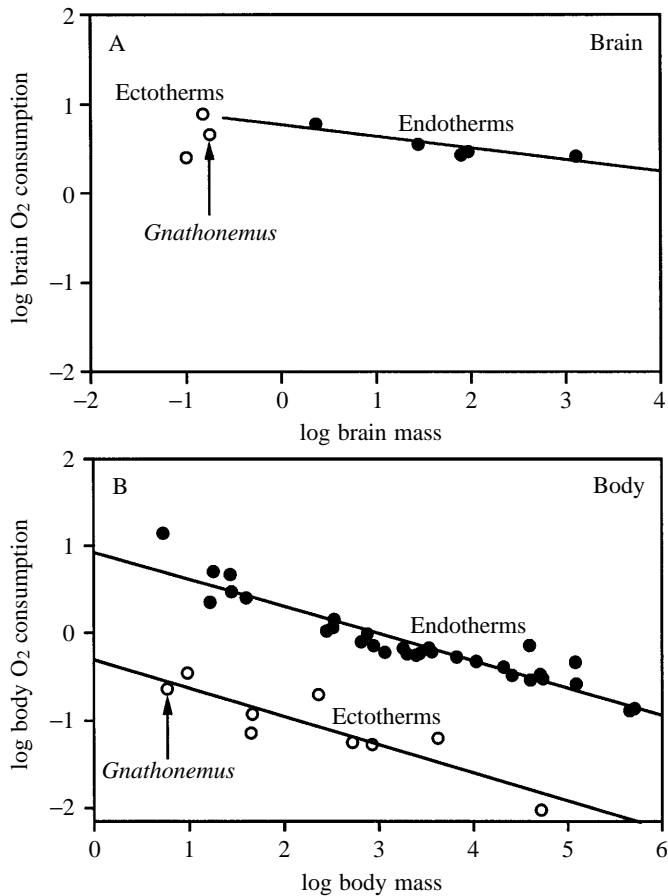

Fig. 3. Brain (A) and standard body (B) O<sub>2</sub> consumption rates in relation to mass in endothermic and ectothermic vertebrates (logarithmic scales). Note that the whole-body O<sub>2</sub> consumption rates are approximately 13 times higher in endotherms than in ectotherms, while there seems to be little or no difference between the O<sub>2</sub> consumption rates of endothermic and ectothermic brains. All values are estimates for 37 °C (assuming a Q<sub>10</sub> of 2.1). Values for ectothermic brains are from Table 1. All other data (except for *Gnathonemus petersii*) are from measurements compiled by Mink *et al.* (1981). The equations for the lines and Pearson's correlation coefficients (*r*) are as follows.  $y=0.767-0.136x$  ( $r=-0.901$ ,  $P=0.037$ ) for endothermic brains;  $y=0.921-0.309x$  ( $r=-0.938$ ,  $P<0.0001$ ) for endothermic bodies;  $y=-0.177-0.357x$  ( $r=-0.86$ ,  $P=0.0029$ ) for ectothermic bodies; where *y* is log O<sub>2</sub> consumption (in mg O<sub>2</sub> g<sup>-1</sup> h<sup>-1</sup>) and *x* is log mass (in g).

As mentioned above, there are several small endothermic vertebrates, notably bats, mice, swallows, crows and sparrows, that have brains which make up 2.6–3.7% of the body mass (Crile and Quiring, 1940; Mink *et al.* 1981). However, the very high whole-body metabolic rates of these small endotherms make their brains comparatively less costly (using only 4–8% of the body energy budget), because in vertebrates the scaling factor of the mass-specific rate of energy expenditure is much lower for the brain than for the whole body (Fig. 3; Mink *et al.* 1981; Schmidt-Nielsen, 1984).

The Q<sub>10</sub> for the rate of O<sub>2</sub> consumption of brain tissue is about 2.1 in vertebrates (Mink *et al.* 1981), suggesting that the

specific rate of O<sub>2</sub> consumption of the *G. petersii* brain at 37 °C would be 4.57 mg g<sup>-1</sup> h<sup>-1</sup>. This is similar to the value of 6.02 mg g<sup>-1</sup> h<sup>-1</sup> given for the rat brain by Nilsson and Siesjö (1976) and it is higher than the oxygen consumption of the human brain (2.61 mg g<sup>-1</sup> h<sup>-1</sup>). The low value of the latter reflects the slightly negative scaling exponent of the metabolic rate of the brain. Among fishes, the brain of *G. petersii* does not have a uniquely high mass-specific rate of O<sub>2</sub> consumption; the value reported in this study was lower than the *in situ* value of 2.20 mg g<sup>-1</sup> h<sup>-1</sup> at 20 °C estimated from previous brain slice measurements in salmonids (Table 1).

The reason why ectothermic brains do not differ much from endothermic brains with regard to the rate of energy utilisation is probably related to the fact that ionic leakage, which occurs at much higher rates and is largely coupled to heat production in endothermic vertebrates (Hulbert and Else, 1990), plays only a minor role in the energy expenditure of the brain. Ion movements involved in electric and synaptic activity are responsible for the largest portion of the energy used by the brain (Erecinska and Silver, 1989), and in this respect there is probably little difference between endothermic and ectothermic brains. Consequently, when exposed to anoxia, rainbow trout brain ion homeostasis becomes disrupted due to energy failure as fast as does that of the mammalian brain (Nilsson *et al.* 1993).

#### Hypoxia tolerance

The striking hypoxia tolerance of *G. petersii* may appear paradoxical for an animal with such an energetically costly brain. *G. petersii* has the ability to regulate the rate of O<sub>2</sub> uptake at low P<sub>O<sub>2</sub></sub>, displaying a critical value for O<sub>2</sub> consumption at approximately 10% O<sub>2</sub> saturation. However, the capacity to utilise low ambient levels of O<sub>2</sub> is probably important for protecting the brain from hypoxic damage. Mormyrids inhabit turbid eutrophic tropical waters in which hypoxia is likely to be a common event. In most vertebrates, the brain is strongly dependent on aerobic energy production, being unable to meet its high ATP demand by anaerobic glycolysis alone (Lutz and Nilsson, 1994). In *G. petersii*, the brain is likely to be the first organ to be affected by energy failure during anoxia; the results presented in Table 1 suggest that its brain consumes O<sub>2</sub> at 20 times the rate of the average body tissue. Indeed, bubbling the water with N<sub>2</sub> revealed that *G. petersii* cannot tolerate an ambient O<sub>2</sub> concentration below 0.3 mg l<sup>-1</sup>, suggesting that its capacity to produce ATP anaerobically is not sufficient to match its rate of ATP consumption. In nature, it is likely that *G. petersii* relies on gulping air or oxygenated surface water when the ambient O<sub>2</sub> concentration falls below the critical level. Aquatic surface respiration in response to low ambient P<sub>O<sub>2</sub></sub> is displayed by numerous fish species, especially in the tropics (Kramer and McClure, 1982).

The discharge frequency of the electric organ of *G. petersii* was maintained at a relatively constant rate down to approximately the same critical ambient P<sub>O<sub>2</sub></sub> as for O<sub>2</sub> consumption (Fig. 2). This indicates that *G. petersii* depresses neither its metabolic rate nor its nervous activity in response to

progressive hypoxia, the discharge rate of the electric organ being under central nervous control (Dye and Meyer, 1986). As in other mormyrid fishes, the electric organ of *G. petersii* delivers electric pulses with a constant amplitude, the electric activity being modulated by changing the discharge rate (Teyssedre and Serrier, 1986). Although not measured in this study, it seems unlikely that this species is able to lower its pulse amplitude in order to save energy in response to progressive hypoxia.

This study reveals that the limit on the proportion of the total energy budget that can be devoted to central nervous activity is much higher than previously known. Since mormyrids seem to be successful fishes, making up some 10% of the African species of freshwater fish (Roberts, 1975), and are abundant enough to be of local commercial importance (Petr, 1968), it is relevant to ask what advantageous abilities are provided by this exceptionally costly brain. It is likely that these abilities not only include electroreception, a highly effective means of orientation and communication in turbid waters, but also social communication, which appears to be well developed in mormyrids (Kramer, 1990; Moller *et al.* 1989). Interestingly, the weakly electric fish of the group Gymnotoidei of South America, which seem to have a similar electric sensory system (Hopkins, 1983), do not show the extreme increase in brain size displayed by the Mormyridae (Nieuwenhuys and Nicholson, 1969).

Finally, from the present results and from other data discussed above, it is clear that the human brain is not unique in gross physiological terms, neither with regard to its relative or absolute size, nor with regard to its mass-specific or fractional metabolic rate.

I thank Mr Sven Olof Carlsson for valuable technical assistance. This study was financially supported by the Swedish Council for Forestry and Agricultural Research, the Swedish Natural Science Research Council, and the Magn. Bergvall Foundation.

### References

- BEAMISH, F. W. H. (1964). Respiration of fishes with special emphasis on standard oxygen consumption. II. Influence of weight and temperature on respiration of several species. *Can. J. Zool.* **42**, 177–187.
- BENJAMIN, A. M. AND VERJEE, Z. H. (1980). Control of aerobic glycolysis in the brain *in vitro*. *Neurochem. Res.* **5**, 921–934.
- CRILE, G. W. (1941). *Intelligence, Power and Personality*. New York: Witlesey.
- CRILE, G. AND QUIRING, D. P. (1940). A record of the body weight and certain organ and gland weights of 3690 animals. *Ohio J. Sci.* **40**, 219–259.
- DYE, J. C. AND MEYER, J. H. (1986). Central control of the electric organ discharge in weakly electric fish. In *Electroreception* (ed. T. H. Bullock and W. Heiligenberg), pp. 71–102. New York: John Wiley.
- ERDL, M. P. (1846). Über das Gehirn der Fischgattung Mormyrus. *Gelehrte Anzeigen d. K. Bayer. Akad. d. Wiss.* **22/23**, 403–407.
- ERECINSKA, M. AND SILVER, I. A. (1989). ATP and brain function. *J. Cereb. Blood Flow Metab.* **9**, 2–19.
- HOPKINS, C. D. (1983). Functions and mechanisms in electroreception. In *Fish Neurobiology*, vol. 1 (ed. R. G. Northcutt and R. E. Davis), pp. 215–259. Ann Arbor: Michigan University Press.
- HULBERT, A. J. AND ELSE, P. L. (1990). The cellular basis of endothermic metabolism: a role for 'leaky' membranes? *News physiol. Sci.* **5**, 25–28.
- JOHANSSON, D., NILSSON, G. E. and TÖRNBLOM, E. (1995). Effects of anoxia on energy metabolism in crucian carp brain slices studied with microcalorimetry. *J. exp. Biol.* **198**, 853–859.
- KRAMER, B. (1990). Sexual signals in electric fish. *Trends Ecol. Evol.* **5**, 247–250.
- KRAMER, D. L. AND MCCLURE, M. (1982). Aquatic surface respiration, a widespread adaptation to hypoxia in tropical freshwater fishes. *Env. Biol. Fish.* **7**, 47–55.
- KROMPECHER, S. AND LIPÁK, J. (1966). A simple method for determining cerebralization. *J. comp. Neurol.* **127**, 113–120.
- LIPTON, P. AND WHITTINGHAM, T. S. (1984). Energy metabolism and brain slice function. In *Brain Slices* (ed. R. Dingledine), pp. 113–153. New York: Plenum Press.
- LUTZ, P. L. AND NILSSON, G. E. (1994). *The Brain Without Oxygen, Causes of Failure and Mechanisms for Survival*. Austin, Texas: R. G. Landes.
- MCILWAIN, H. AND BACHELARD, H. S. (1971). *Biochemistry and the Central Nervous System*. London: Churchill-Livingstone.
- MINK, J. W., BLUMENSCHINE, R. J. AND ADAMS, D. B. (1981). Ratio of central nervous system activity to body metabolism in vertebrates: its constancy and functional basis. *Am. J. Physiol.* **241**, R203–R212.
- MOLLER, P., SERRIER, J. AND BOWLING, D. (1989). Electric organ discharge displays during social encounter in the weakly electric fish *Brienomyrus niger* L. (Mormyridae). *Ethology* **82**, 177–191.
- NIEUWENHUYIS, R. AND NICHOLSON, C. (1969). A survey of the general morphology, the fiber connections and the possible functional significance of the gigantocerebellum of mormyrid fishes. In *Neurobiology of Cerebellar Evolution and Development* (ed. R. Llinás), pp. 107–134. Chicago: Am. Med. Assoc.
- NILSSON, B. and SIESJÖ, B. K. (1976). A method for determining blood flow and oxygen consumption in the rat brain. *Acta physiol. scand.* **96**, 72–82.
- NILSSON, G. E. (1992). Evidence for a role of GABA in metabolic depression during anoxia in crucian carp (*Carassius carassius* L.). *J. exp. Biol.* **164**, 243–259.
- NILSSON, G. E., PÉREZ-PINZÓN, M., DIMBERG, K. and WINBERG, S. (1993). Brain sensitivity to anoxia in fish as reflected by changes in extracellular potassium-ion activity. *Am. J. Physiol.* **264**, R250–R253.
- PETERSON, R. H. AND ANDERSON, J. M. (1969). Effect of temperature on brain tissue O<sub>2</sub> consumption in salmonid fishes. *Can. J. Zool.* **47**, 1345–1353.
- PETR, T. (1968). Distribution, abundance and food of commercial fish in the Black Volta and the Volta manmade lake in Ghana during its first period of filling (1964–1966). I. Mormyridae. *Hydrobiologia* **32**, 417–448.
- ROBERTS, T. (1975). Geographical distribution of African freshwater fishes. *Zool. J. Linn. Soc.* **57**, 249–319.
- SCHMIDT-NIELSEN, K. (1984). *Scaling*. Cambridge: Cambridge University Press.
- TEYSSÉDRE, C. AND SERRIER, J. (1986). Temporal spacing of signals in communication, studied in weakly-electric mormyrid fish (Teleostei, Pisces). *Behav. Processes* **12**, 77–98.
